# Supplementary material for: HUST-Grace2024: a new GRACE-only gravity field time series based on more than 20 years satellite geodesy data and a hybrid processing chain
Source: Copernicus journal article supplement (doi:10.5194/essd-2024-39), 2024-03-12
Supplement: Supplementary file [file essd-2024-39-AC4-supplement.pdf]

**AC: We thank the reviewers for taking time to review this manuscript. Their insightful remarks have helped us to identify parts in the manuscript which needed clarification and certainly allowed us to improve the quality of this paper.**

**Community Comment#2**

Review about the paper

**HUST-Grace2024: a new GRACE-only gravity field time series based on more than 20 years satellite geodesy data and a hybrid processing chain**

submitted to Earth System Science Data (<https://doi.org/10.5194/essd-2024-39>)

Authors: Hao Zhou, Lijun Zheng, Yaozong Li, Xiang Guo, Zebing Zhou, and Zhicai Luo

1. Page 20, L7, 'including (a, e, f) CSR RL06, (b, f, j) GFZ RL06, (e, g, k) JPL RL06 and (d, h, f) HUST-Grace2024' should be corrected as 'including (a, e, i) CSR RL06, (b, f, j) GFZ RL06, (c, g, k) JPL RL06 and (d, h, l) HUST-Grace2024'

**AC: Thank you for insightful comments, we have replotted the figure in our revised paper.**

---
